# Supplementary material
Source: Springer Nature journal article supplement (https://www.springermedizin.de/resource/supplementary/12887_2006_151_MOESM1_ESM.pdf/9477374)

**Study****N****Offspring  
Age****RCT  
Design****Calcium  
Source****Effect size and 95% CI****Age less than 12 month****McGarvey (1990)**

212

At birth

No

F+S

**McGarvey (1990)**

184

1 month

No

F+S

**McGarvey (1990)**

260

6 month

No

F+S

**Hatton (2003)**

114

6 month

Yes

S

**Gillman (2004)**

936

6 month

No

S

**Gillman (2004)**

936

6 month

No

F

**Age 12 month or more****McGarvey (1990)**

70

12 month

No

F+S

**Hatton (2003)**

53

2 years

Yes

S

**Belizan (1997)**

518

7 years

Yes

S

**Morley (2004)**

294

9 years

No

S

**All (12 month or more)**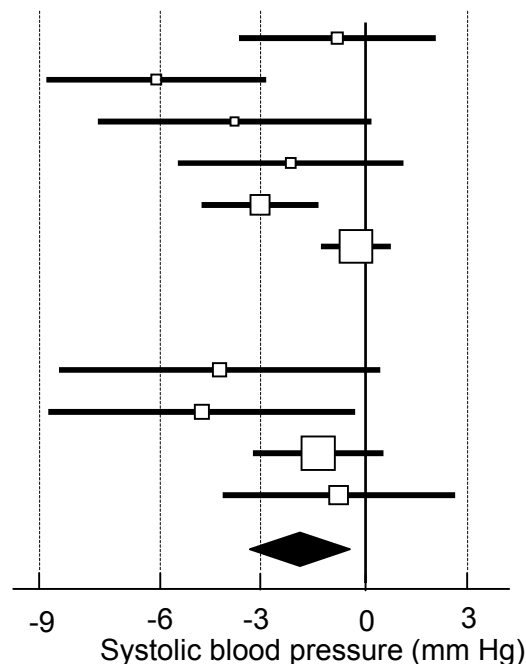

Supplement: MOESM1 [file 9477374]
